# Supplementary material for: Development of a microfluidics biosensor for agarose-bead immobilized Escherichia coli bioreporter cells for arsenite detection in aqueous samples
Source: Royal Society of Chemistry journal article supplement (doi:10.1039/c1lc20274j), 2011-01-01
Supplement: c1lc20274j.pdf [file c1lc20274j.pdf]

Supplementary information to:

*Development of a microfluidics biosensor for agarose-bead immobilized*

*Escherichia coli bioreporter cells for arsenite detection in aqueous samples.*

Nina Buffi<sup>1</sup>, Davide Merulla<sup>2</sup>, Julien Beutier<sup>1</sup>, Fanny Barbaud<sup>1</sup>, Siham Beggah<sup>2</sup>,  
Harald van Lintel<sup>1</sup>, Philippe Renaud<sup>1</sup>, and Jan Roelof van der Meer<sup>2\*</sup>.

1) Laboratory of Microsystems Engineering, Ecole Polytechnique Fédérale  
Lausanne, EPFL-STI-LMIS, Station 17, CH-1015 Lausanne, Switzerland

2) Department of Fundamental Microbiology, University of Lausanne,  
Switzerland

\* Corresponding author

Jan Roelof van der Meer

Department of Fundamental Microbiology, Bâtiment Biophore, Quartier UNIL-  
Sorge, University of Lausanne, 1015 Lausanne, Switzerland

Email: [janroelof.vandermeer@unil.ch](mailto:janroelof.vandermeer@unil.ch)

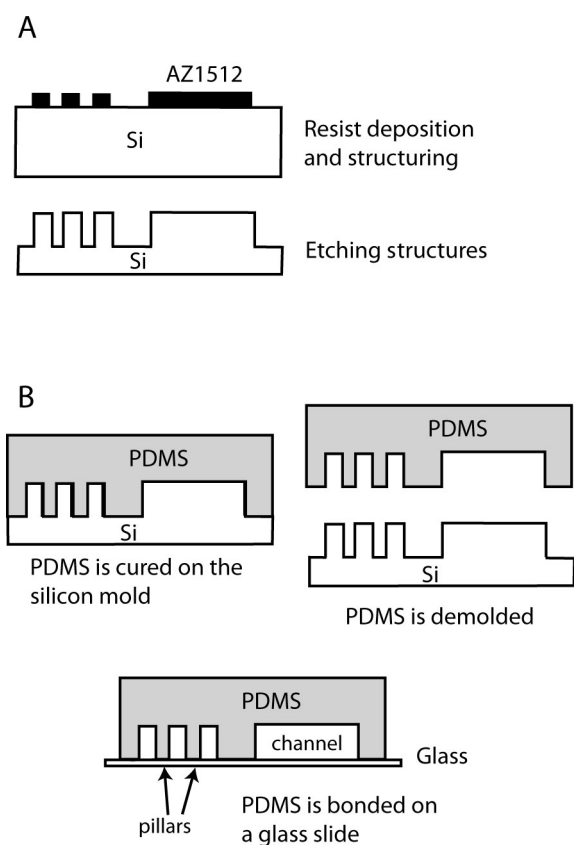

Figure S1: Microfluidic system fabrication procedure. A) Production of the silicon mold. B) Negative imprint of the mold in the PDMS layer. Demolding of the PDMS layer and bonding to glass slide, by which the channels and pillars are formed.

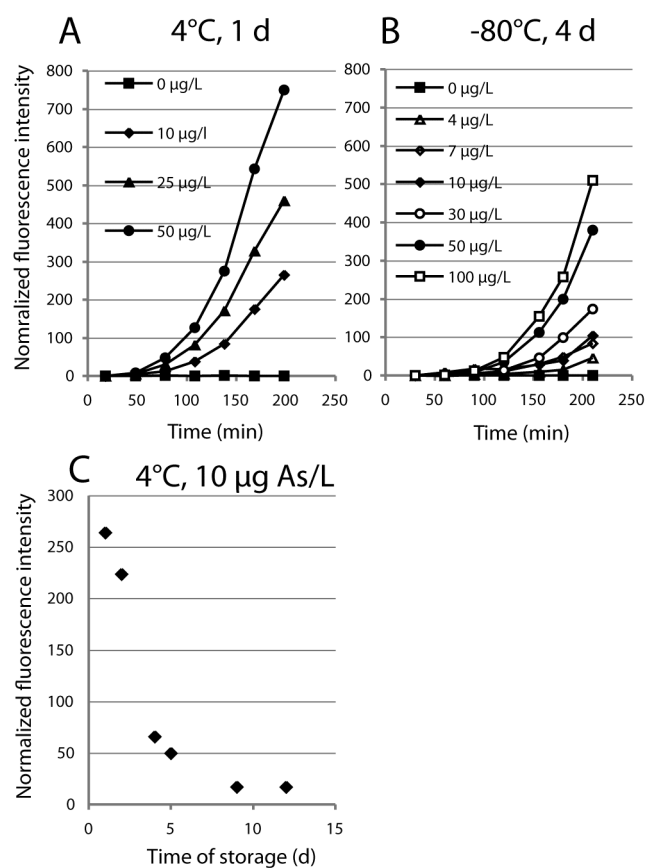

Figure S2: Biosensor performance data for 4°C and -80°C stored cells in beads outside the microfluidics chip. A) Normalized EGFP response from cells in beads stored at 4°C for 1 day to different arsenite concentrations over time (single lane reads). B) As for A, but with -80°C stored beads for 4 d. C) Decrease of signal after 120 min with 10 µg As per L in case of 4°C stored cells in beads.
